## THE REGULATION OF INTRACELLULAR pH ESTIMATED BY $^{31}\text{P}$ -NMR SPECTROSCOPY IN THE ANTERIOR BYSSUS RETRACTOR MUSCLE OF *MYTILUS EDULIS* L.

BY J. ZANGE<sup>1</sup>, M. K. GRIESHABER<sup>2</sup> AND A. W. H. JANS<sup>1</sup>

<sup>1</sup>*Max-Planck-Institut für Systemphysiologie, Rheinlanddamm 201, 4600 Dortmund, FRG* and <sup>2</sup>*Zoologisches Institut, Lehrstuhl für Tierphysiologie, Heinrich-Heine-Universität, Universitätsstrasse 1, 4000 Düsseldorf, FRG*

Accepted 13 December 1989

### Summary

The regulation of the intracellular pH (pHi) in the anterior byssus retractor muscle (ABRM) of *Mytilus edulis* L. during an acidic and alkaline load was studied by  $^{31}\text{P}$ -NMR spectroscopy. Under aerobic conditions, a total intracellular buffer capacity of  $26.5 \pm 0.7 \text{ mmol l}^{-1} \text{ pH unit}^{-1}$  ( $N=3$ ) was estimated. In the absence of serotonin, active acid extrusion was by a  $\text{Na}^+$ -independent, primary active transport mechanism coupled to anion transport. Base equivalents appear to be extruded by a  $\text{Cl}^-/\text{HCO}_3^-$  exchanger. Serotonin ( $10^{-5} \text{ mol l}^{-1}$ ) induced an increase in pHi through additional activation of a  $\text{Na}^+/\text{H}^+$  exchanger.

### Introduction

The anterior byssus retractor muscle of *Mytilus edulis* belongs to a special group of molluscan smooth muscles called catch muscles. After an active contraction elicited by acetylcholine, the ABRM is able to maintain muscle tension and shortening by a passive mechanism called catch (for a review, see Rüegg, 1971). The stretch resistance of the ABRM during catch depends on changes in the intracellular pH within a range of 0.2 pH units. During catch, acidification of the intracellular milieu decreases the velocity by which an isotonicity contracted ABRM is stretched, whereas alkalinization increases it (Zange *et al.* 1988; Zange *et al.* 1990). At concentrations above  $10^{-6} \text{ mol l}^{-1}$ , serotonin elicits a rapid relaxation of catch and induces a permanent increase in pHi (Twarog, 1954).

Changes in pHi can also be elicited in all tissues by stress factors originating from the mussel's habitat, the intertidal zone of northern seashores. During low tide, when mussels are exposed to air, they close their shells tightly to avoid desiccation. During this period the oxygen stored within the shell is used within minutes and  $\text{CO}_2$  cannot be released. Therefore, the mussels survive low tide in an anaerobic state (Brinkhoff *et al.* 1983). The resulting hypercapnic acidosis is

**Key words:** ABRM, intracellular pH, serotonin, sodium/proton exchange, chloride/bicarbonate exchange.

increased by a metabolic acidosis resulting from anaerobic metabolism (Pörtner, 1987). During 8 h of exposure to air the pH of the haemolymph decreases from 7.65 to 7.24 and the intracellular pH of the posterior adductor muscle decreases from 7.38 to 7.15 (Booth *et al.* 1984; Walsh *et al.* 1984). At the onset of high tide, rapid release of CO<sub>2</sub> could cause an intracellular alkalization. Thus, since maintenance of catch depends at least partially on the pHi (Zange *et al.* 1990), the ABRM must have effective mechanisms of pH regulation to avoid pronounced changes of pHi.

This study was designed to investigate the mode of pHi regulation in the ABRM. We concentrated on the intracellular buffering capacity and the activity of ion-exchange mechanisms in the absence and presence of serotonin.

## Materials and methods

### *Animals*

Mussels (*Mytilus edulis* L.) were obtained from the Nederlands Instituut voor Onderzoek der Zee, Den Helder, The Netherlands. The animals were kept in recirculating, filtered artificial sea water (32‰) for 3–12 weeks at 15±1°C until used in the experiments.

### *Preparation and incubation*

The shell was opened and the byssus, which is held within the shell by two anterior and two posterior byssus retractor muscles, was isolated from the surrounding tissue. Silk threads were tied to the byssal ends of the two ABRMs and to those ends where the muscles were attached to the shell. Finally, the ABRMs were separated from byssus and shell.

For a single experiment four or five ABRMs with a total wet mass of 100–150 mg were used. The muscles were tied at their shell ends to a muscle holder which was placed at the bottom of a 10 mm NMR tube. Using the threads tied to the byssal ends of the muscles, the ABRMs were arranged vertically within the NMR tube. The tube was filled with 4 ml of air-equilibrated standard medium at 15±1°C and a pH of 7.65±0.02. A gas-inlet capillary was placed 0.5 cm above the sensitive range of the receiver coil. The medium was mixed by gassing until a homogenous distribution of oxygen was achieved.

### *Medium exchange*

To determine the dependence of pHi on extracellular pH (pHe) the incubation medium was changed outside the spectrometer. pHe was measured before and after a period of data acquisition using a normal laboratory pH meter.

For CO<sub>2</sub>- and NH<sub>4</sub>Cl-pulse experiments, the medium was changed in the spectrometer using an additional glass capillary placed on the muscle holder. The medium was removed quantitatively by a vacuum pump and replaced by new medium pre-equilibrated either with air or with an air/10% CO<sub>2</sub> mixture.

### Media

The standard medium had the following composition (in  $\text{mmol l}^{-1}$ ): NaCl, 438; KCl, 10;  $\text{MgCl}_2$ , 24;  $\text{MgSO}_4$ , 28;  $\text{CaCl}_2$ , 10 and HEPES/NaOH, 30.  $\text{HCO}_3^-$  was formed during the equilibration with air ( $P_{\text{CO}_2}=0.31 \text{ kPa}$ ) or 10%  $\text{CO}_2$  ( $P_{\text{CO}_2}=10.1 \text{ kPa}$ ) depending on the prevailing pHe.

In  $\text{Na}^+$ -free media,  $\text{Na}^+$  was replaced either by choline chloride and KOH or by *N*-methyl-D-glucamine. DIDS (4,4'-diisothiocyanostilbene-2,2'-disulphonic acid) was dissolved in standard medium to make a saturated solution (between 0.5 and  $1 \text{ mmol l}^{-1}$ ). In  $\text{Cl}^-$ -free medium,  $\text{Cl}^-$  was replaced by glucuronate. The ABRMs were pre-equilibrated with these media for 30 min before an experiment was started.

### Standard conditions

A muscle was considered to be kept under 'standard conditions' when it was incubated in aerated standard medium at pH 7.65.

### Determination of the intracellular pH by $^{31}\text{P}$ -NMR spectroscopy

Recordings of  $^{31}\text{P}$ -NMR spectra and the determination of pHi from the chemical shift of the intracellular inorganic phosphate were performed as described by Zange *et al.* (1990). The titration curve (Fig. 1) was used to measure the relationship between the chemical shift of inorganic phosphate and pHi.

### Statistical analysis of the results

The significance of a difference between two values of pHi (means  $\pm$  s.d.) was tested using Student's *t*-test ( $P < 0.05$ ). A rate of recovery was calculated from the time course of pHi change within an appropriate interval using linear regression analysis. The rate of recovery was calculated as the regression coefficient ( $\pm$  s.d.)

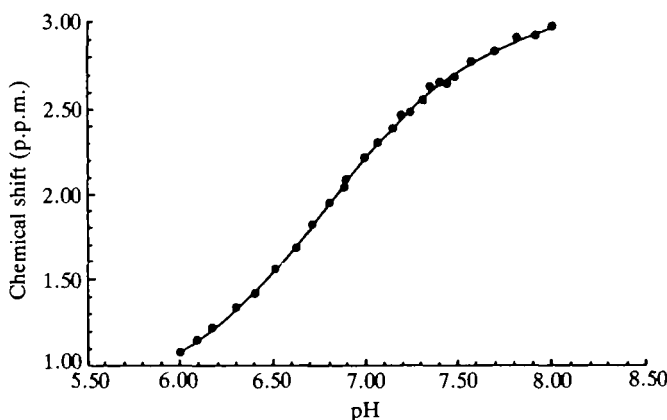

Fig. 1. Titration curve showing the dependence of the chemical shift on the pH of a muscle extract with  $\text{Ca}^{2+}$  complexed by EGTA.

when  $r \geq 0.90$ . Deviation from a rate of zero and the difference between two rates were again tested for significance using the appropriate *t*-tests.

## Results

### *The steady-state pHi under standard conditions*

A typical  $^{31}\text{P}$ -NMR spectrum is shown in Fig. 2. The pHi of the ABRMs incubated in air-equilibrated standard medium at pH 7.65 was found to be  $7.45 \pm 0.02$  ( $N=7$ ) in the absence of serotonin.

### *The dependence of the steady-state pHi on extracellular pH*

The dependence of pHi on the extracellular pH (pHe) was studied within the pH range 6.00–8.30. In standard medium pHi was regulated within a range from  $7.11 \pm 0.03$  to  $7.49 \pm 0.04$  ( $N=4$ ). At pHe values more alkaline than 7.65, pHi did not deviate as much from its standard value as it did within the more acidic range of pHe. The steady-state values of pHi over the whole range are shown in Fig. 3A.

A  $\text{Na}^+$ -free medium was used to determine whether a  $\text{Na}^+$ -dependent,

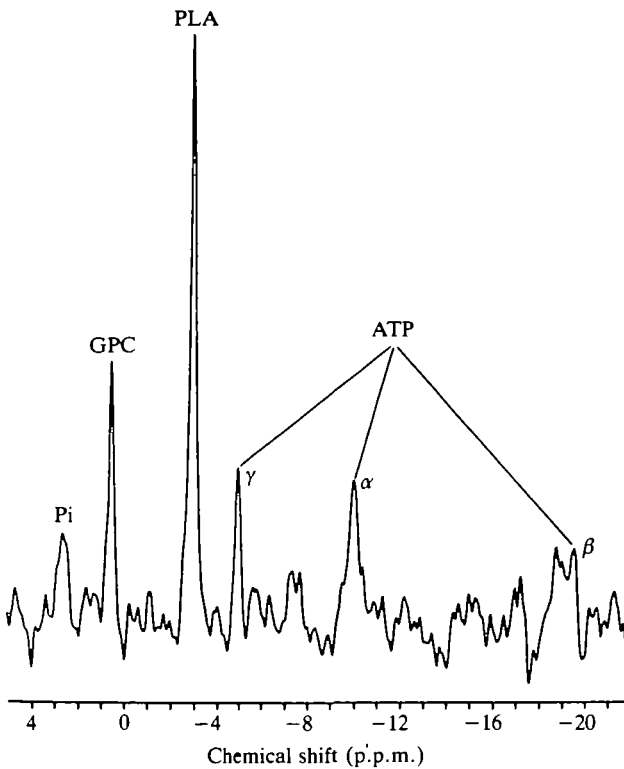

Fig. 2. A typical  $^{31}\text{P}$ -NMR spectrum (161.5 MHz) obtained from four ABRMs within 2.9 min (512 scans). Signals were observed from ATP ( $\alpha$ ,  $\beta$  and  $\gamma$  phosphate), phospho-L-arginine (PLA), glycerophosphorylcholine (GPC) and inorganic phosphate (Pi).

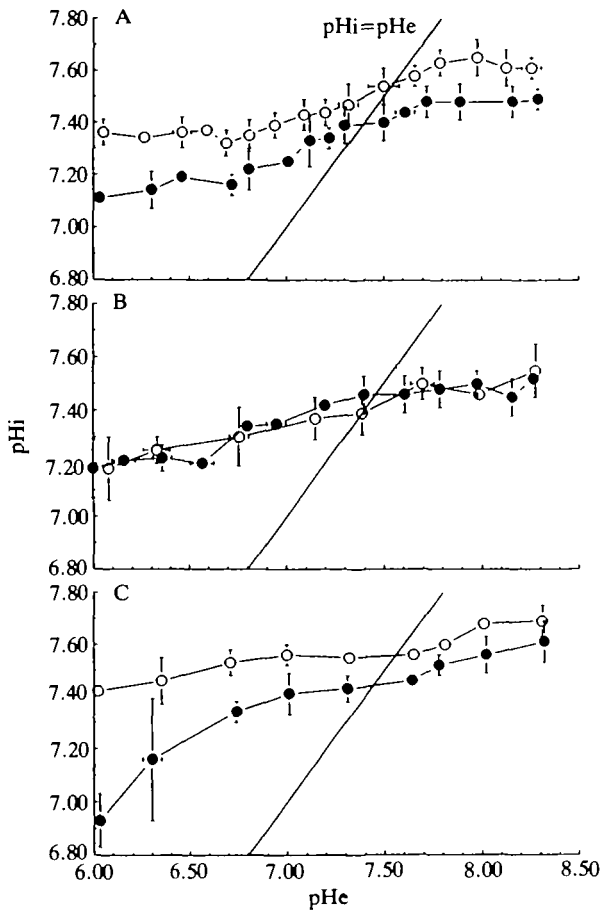

Fig. 3. The dependence of the steady-state pHi on the extracellular pH in the absence (●) and in the presence (○) of serotonin. (A) Aerated standard medium ( $N=4$ ). (B)  $\text{Na}^+$ -free medium with  $\text{Na}^+$  being replaced by choline and *N*-methyl-D-glucamine ( $N=3$ ). (C) Standard medium containing DIDS at saturating concentrations ( $0.5\text{--}1.0\text{ mmol l}^{-1}$ ;  $N=3$ ).

secondary active transport mechanism was present in ABRMs (Fig. 3B).  $\text{Na}^+$  was replaced by choline and *N*-methyl-D-glucamine. In  $\text{Na}^+$ -free media, in the absence of serotonin, pHi was regulated between  $7.18 \pm 0.11$  and  $7.49 \pm 0.07$  ( $N=3$ ). Consequently, the regulation of pHi was not inhibited by the removal of  $\text{Na}^+$  and, therefore, did not depend on a secondary active mechanism.

DIDS, which was used as a probe for an anion exchanger, inhibited the regulation of pHi in the absence of serotonin (Fig. 3C). The resulting pHi values were significantly different from those measured in the absence of DIDS at  $\text{pHe } 6.03 \pm 0.03$  (pHi  $6.93 \pm 0.10$ ,  $N=5$  versus  $7.11 \pm 0.03$ ,  $N=4$ ) and  $\text{pHe } 8.32 \pm 0.01$  (pHi  $7.61 \pm 0.08$  versus  $7.49 \pm 0.04$ ).

In the presence of  $10^{-5}\text{ mol l}^{-1}$  serotonin (Fig. 3A), ABRM preparations,

incubated in standard medium at pHe 6.0–8.3, regulated their pHi at significantly higher levels than in the absence of serotonin. pHi was regulated between  $7.36 \pm 0.05$  and  $7.61 \pm 0.04$  ( $N=3$ ).

In  $\text{Na}^+$ -free medium (Fig. 3B) the serotonin-induced alkalinization was completely inhibited. The levels of pHi were not significantly different from those measured in the absence of serotonin in  $\text{Na}^+$ -free medium. DIDS, however, did not inhibit the alkalinization induced by serotonin (Fig. 3C).

### *Effect of $\text{CO}_2$ on pHi*

A group of five ABRMs was subjected to a medium equilibrated with a mixture of 95 % air and 5 %  $\text{CO}_2$ . Under these conditions changes of pHi in the ABRMs could not be detected because the regulation of pHi was too fast. Therefore, we chose an equilibration with 10 %  $\text{CO}_2$  to change pHi. pHe in aerated medium was titrated to 7.65. After equilibration with 10 %  $\text{CO}_2$ , pHe decreased to  $6.55 \pm 0.05$  ( $N=13$ ).

pHi changes in the absence of serotonin following the addition and removal of 10 %  $\text{CO}_2$  are presented in Fig. 4. The pHi of the ABRMs in aerated standard medium was found to be  $7.45 \pm 0.02$  ( $N=4$ ). When they were exposed to 10 %  $\text{CO}_2$ , pHi fell to a minimum of  $6.85 \pm 0.02$  ( $N=4$ ;  $\Delta\text{pHi} = -0.60 \pm 0.03$ ). pHi recovered slowly at  $0.006 \pm 0.001$  units  $\text{min}^{-1}$  (Fig. 4A).

Since the rate of pHi recovery was low during a  $\text{CO}_2$  pulse under standard conditions, the intrinsic buffering capacity ( $\beta_i$ ), defined as  $\Delta[\text{HCO}_3^-]_i / \Delta\text{pHi}$ , could be calculated from  $\Delta\text{pHi}$  at the minimum pHi, assuming that  $\text{CO}_2$  is equilibrated between the extra- and intracellular spaces in the ABRM (Heisler, 1986). The value of  $\beta_i$  under standard conditions was  $26.8 \pm 1.6$   $\text{mmol l}^{-1}$  pH unit $^{-1}$ .

When the medium was changed to  $\text{CO}_2$ -free, aerated medium, the release of  $\text{CO}_2$  from the intracellular spaces was followed by a rapid increase of pHi, reaching a maximum of  $7.67 \pm 0.09$  ( $N=4$ ),  $0.22 \pm 0.11$  units above the initial level. Thereafter, pHi significantly recovered at  $-0.034 \pm 0.001$  units  $\text{min}^{-1}$ , reaching its initial value after 8.8 min.

In  $\text{Na}^+$ -free medium, the effects of  $\text{CO}_2$  on pHi in the absence of serotonin were not significantly different from those on muscles in standard medium (Fig. 4B). In the presence of  $\text{CO}_2$ , pHi decreased significantly from  $7.37 \pm 0.05$  to  $6.80 \pm 0.02$  ( $N=3$ ,  $\Delta\text{pHi} = -0.57 \pm 0.06$ ;  $\beta_i = 26.4 \pm 2.2$   $\text{mmol l}^{-1}$  pH unit $^{-1}$ ). The rate of re-alkalinization was again  $+0.006 \pm 0.001$  units  $\text{min}^{-1}$ . When  $\text{CO}_2$  had been removed from the muscles, pHi significantly increased to  $7.54 \pm 0.04$  ( $\Delta\text{pHi} = +0.17 \pm 0.05$ ) followed by a re-acidification of  $-0.032 \pm 0.009$  units  $\text{min}^{-1}$ .

In the presence of DIDS and in the absence of serotonin the fast decrease of pHi during the initial phase of  $\text{CO}_2$  application was not followed by a period of recovery (Fig. 4C). pHi continued to decrease slowly during the whole period of  $\text{CO}_2$  application. When  $\text{CO}_2$  was removed, pHi rose to a significantly higher value than in the absence of DIDS (maximum pHi =  $7.80 \pm 0.05$ ,  $\Delta\text{pHi} = +0.39 \pm 0.07$ ),

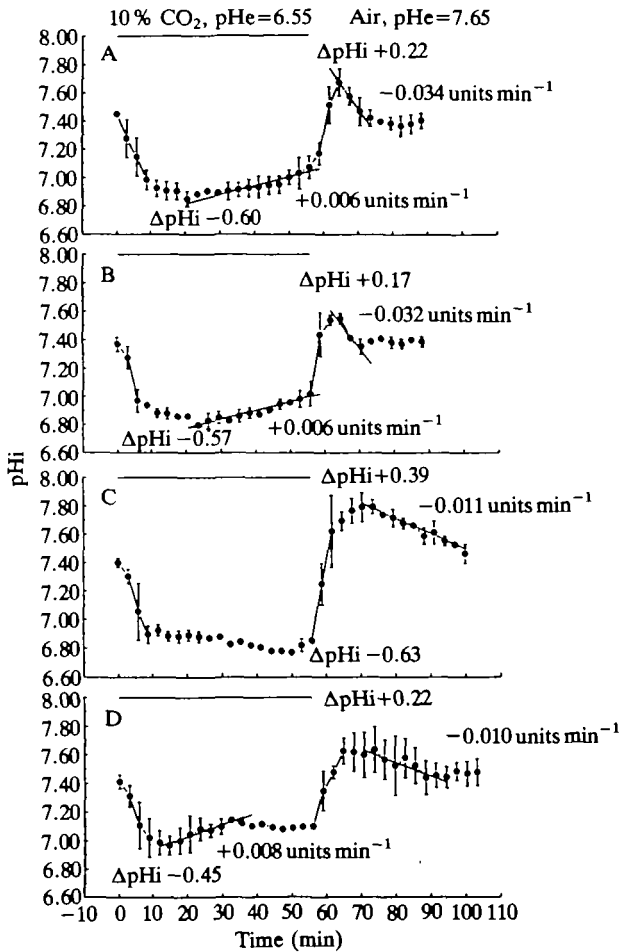

Fig. 4. Time course of changes in pHi in ABRMs during and after exposure to a mixture of air and 10% CO<sub>2</sub> in the absence of serotonin.  $\Delta$ pHi values are the difference between the minimum or maximum pHi, respectively, and the steady-state pHi of controls. Recovery rates have been calculated by linear regression. (A) Standard medium ( $N=4$ ); (B) Na<sup>+</sup>-free medium ( $N=3$ ; Na<sup>+</sup> replaced by *N*-methyl-D-glucamine); (C) standard medium containing saturating concentrations of DIDS (0.5–1.0 mmol l<sup>-1</sup>;  $N=3$ ); (D) Cl<sup>-</sup>-free medium ( $N=3$ ; Cl<sup>-</sup> replaced by D-glucuronate).

$N=3$ ). The rate of recovery was significantly reduced to  $-0.011 \pm 0.001$  units min<sup>-1</sup> (34% of the rate in the absence of DIDS).

Cl<sup>-</sup>-free medium was used to demonstrate the presence of a Cl<sup>-</sup>/HCO<sub>3</sub><sup>-</sup> exchanger (Fig. 4D). In Cl<sup>-</sup>-free medium, pHi decreased significantly from  $7.41 \pm 0.05$  to  $6.97 \pm 0.07$  ( $N=3$ ) during the initial period of CO<sub>2</sub> exposure in the absence of serotonin. As pHi only decreased by  $-0.45 \pm 0.14$  units, a buffering capacity of  $52 \pm 21$  mmol l<sup>-1</sup> pH unit<sup>-1</sup> was calculated, a significant increase above

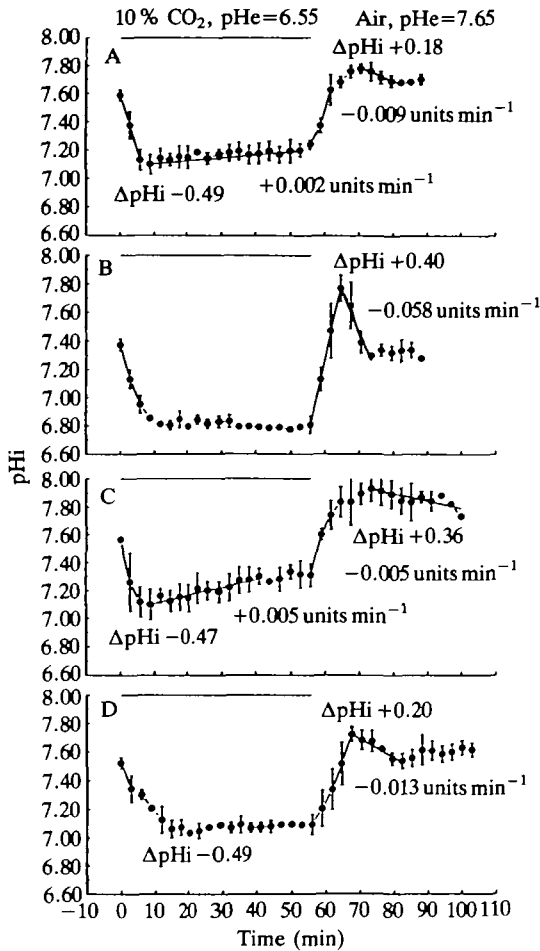

Fig. 5. Time course of changes in pHi of ABRMs during and after exposure to media equilibrated with a mixture of air and 10% CO<sub>2</sub> in the presence of serotonin.  $\Delta$ pHi values are the difference between the minimum or the maximum pHi and the control steady-state pHi. Recovery rates have been calculated by linear regression. Media are standard medium (A,  $N=4$ ), Na<sup>+</sup>-free medium (B,  $N=3$ , Na<sup>+</sup> replaced by *N*-methyl-D-glucamine), standard medium saturated with DIDS (C,  $N=3$ , 0.5–1.0 mmol l<sup>-1</sup>) and Cl<sup>-</sup>-free medium (D,  $N=3$ , Cl<sup>-</sup> replaced by D-glucuronate).

$\beta_i$  estimated under standard conditions. When pHi reached its minimum, a transient but significant re-alkalinization of  $+0.008 \pm 0.001$  units min<sup>-1</sup> was observed until pHi reached a value of  $7.10 \pm 0.05$ . It remained at this value for the remainder of the period of CO<sub>2</sub> application. When CO<sub>2</sub> was removed from the ABRMs, pHi rose to  $7.64 \pm 0.16$  ( $\Delta$ pHi =  $+0.22 \pm 0.16$ ). The rate of recovery was only  $-0.010 \pm 0.002$  units min<sup>-1</sup> (31% of the rate in standard medium).

The changes in pHi in the presence of serotonin ( $10^{-5}$  mol l<sup>-1</sup>) in response to addition or removal of 10% CO<sub>2</sub> are presented in Fig. 5. When ABRMs were



exposed to CO<sub>2</sub> in standard medium containing serotonin, pHi decreased from  $7.59 \pm 0.04$  to  $7.10 \pm 0.07$  ( $N=3$ ; Fig. 5A). The  $\Delta\text{pHi}$  of  $-0.49 \pm 0.06$  was correlated with a buffer capacity of  $63.0 \pm 14.1 \text{ mmol l}^{-1} \text{ pH unit}^{-1}$ , which was significantly increased above  $\beta_i$  calculated for standard conditions (2.5 times). When pHi had reached its minimum, a slow re-alkalinization of  $0.002 \pm 0.001 \text{ units min}^{-1}$  was observed. pHi did not recover as long as the ABRMs were subjected to CO<sub>2</sub>. When CO<sub>2</sub> was removed, pHi increased to  $7.78 \pm 0.03$ , followed by a slow re-acidification of  $-0.009 \pm 0.001 \text{ units min}^{-1}$  (28% of the rate in absence of serotonin).

In Na<sup>+</sup>-free medium (Fig. 5B) pHi dropped by  $0.56 \pm 0.02$  units from  $7.37 \pm 0.04$  to  $6.81 \pm 0.03$  ( $N=3$ ). The calculated buffering capacity of  $26.4 \pm 2.2 \text{ mmol l}^{-1} \text{ pH unit}^{-1}$  was equal to  $\beta_i$  calculated for standard conditions. After the initial acidification, pHi remained at constant levels for the whole period of CO<sub>2</sub> exposure. Removal of CO<sub>2</sub> was followed by a rapid alkalinization (pHi  $7.77 \pm 0.09$ ) and a subsequent rapid re-acidification of  $-0.058 \pm 0.007 \text{ units min}^{-1}$ .

DIDS and Cl<sup>-</sup>-free medium (Fig. 5C,D) did not inhibit the effect of serotonin on the regulation of pHi during exposure to CO<sub>2</sub>. When CO<sub>2</sub> was removed in the presence of DIDS and serotonin, pHi rose to significantly higher levels ( $7.93 \pm 0.09$ ) than those reached in the absence of DIDS. This was followed by a slow re-acidification of  $-0.005 \pm 0.013 \text{ units min}^{-1}$  (56% of the uninhibited rate in the presence of serotonin). In Cl<sup>-</sup>-free medium containing serotonin, pHi increased to  $7.72 \pm 0.05$  when CO<sub>2</sub> was removed. This alkalinization was followed by a re-acidification of  $-0.013 \pm 0.001 \text{ units min}^{-1}$ .

#### *The total intracellular buffering capacity*

In three series of experiments ABRMs were subjected to 5, 10, 15 or 20 mmol l<sup>-1</sup> NH<sub>4</sub>Cl dissolved in standard medium titrated to pH 7.65. Muscles were exposed to each concentration of NH<sub>4</sub>Cl for 29.4 min followed by a period of recovery in standard medium. At the beginning of exposure to NH<sub>4</sub>Cl, pHi increased until it reached a maximum value within 6–12 min. During the remaining period of NH<sub>4</sub>Cl exposure pHi decreased. When NH<sub>4</sub>Cl was removed from the ABRMs, pHi rapidly recovered to its initial levels. Even when the muscles had been subjected to 15 or 20 mmol l<sup>-1</sup> NH<sub>4</sub>Cl, no transient decrease below the initial levels occurred. Fig. 6 gives an example of such an experiment.

In each experiment we calculated the total intracellular buffering capacity, defined as  $\Delta[\text{NH}_4^+]_i / \Delta\text{pHi}$ , from the increase of pHi at its maximum (Roos and Boron, 1981). A  $\text{pK}_{\text{NH}_4}$  of 9.6 was taken from Boutilier *et al.* (1984). The rate of transport of base equivalents ( $\text{mmol l}^{-1} \text{ min}^{-1}$ ) was calculated from the product of buffering capacity ( $\text{mmol l}^{-1} \text{ pH unit}^{-1}$ ) and recovery rate ( $\Delta\text{pH min}^{-1}$ ). The results are summarized in Table 1.

### Discussion

In the haemolymph of mussels (*Mytilus edulis*) living in aerated sea water Booth

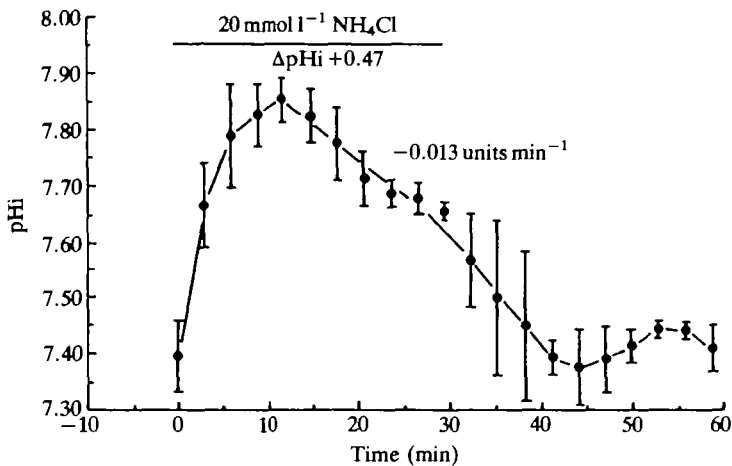

Fig. 6. Time course of changes in pHi in ABRMs during and after exposure to  $20 \text{ mmol l}^{-1} \text{ NH}_4\text{Cl}$  in standard medium ( $\text{pHe}=7.65$ ). Values are mean  $\pm$  s.d. ( $N=3$ ).

Table 1. The intracellular buffer capacity ( $\beta_i$ ) of the ABRM calculated by the alkaline load during exposure to 5, 10, 15 or  $20 \text{ mmol l}^{-1} \text{ NH}_4\text{Cl}$  and the rate of recovery of pHi

| $\text{NH}_4\text{Cl}$<br>( $\text{mmol l}^{-1}$ ) | Maximum<br>pHi $\pm$ s.d. | pHi $\pm$ s.d.  | $\beta_i \pm$ s.d.<br>( $\text{mmol l}^{-1} \text{ pH}$<br>$\text{unit}^{-1}$ ) | Rate of<br>recovery<br>( $\Delta \text{pH min}^{-1}$ ) | Transport of<br>base equivalent<br>( $\text{mmol l}^{-1} \text{ min}^{-1}$ ) |
|----------------------------------------------------|---------------------------|-----------------|---------------------------------------------------------------------------------|--------------------------------------------------------|------------------------------------------------------------------------------|
| 20                                                 | $7.85 \pm 0.04$           | $0.47 \pm 0.04$ | $27.1 \pm 4.0$                                                                  | 0.013                                                  | 0.35                                                                         |
| 15                                                 | $7.81 \pm 0.01$           | $0.39 \pm 0.03$ | $26.6 \pm 2.8$                                                                  | 0.009                                                  | 0.24                                                                         |
| 10                                                 | $7.71 \pm 0.05$           | $0.32 \pm 0.02$ | $26.8 \pm 3.7$                                                                  | 0.007                                                  | 0.19                                                                         |
| 5                                                  | $7.63 \pm 0.04$           | $0.20 \pm 0.01$ | $25.6 \pm 3.7$                                                                  | 0.008                                                  | 0.20                                                                         |
| Mean $\pm$ s.d.                                    |                           |                 | $26.5 \pm 0.7$                                                                  |                                                        |                                                                              |

Aerated medium,  $15^\circ\text{C}$ ,  $\text{pHe}=7.65$ ,  $N=3$ ,  $\text{pK}_{\text{NH}_4}=9.6$  (Boutilier *et al.* 1984).

*et al.* (1984) measured a pH of 7.65 and a  $P_{\text{CO}_2}$  slightly above the  $P_{\text{CO}_2}$  in the sea water. The standard conditions, defined in our study ( $P_{\text{CO}_2} \approx 0.031 \text{ kPa}$ ;  $\text{pH}=7.65$ ;  $[\text{HCO}_3^-] \approx 0.4 \text{ mmol l}^{-1}$ ) are close to physiological conditions in the haemolymph of aerobic mussels. Under these conditions the pHi of the ABRMs was found to be  $7.45 \pm 0.02$  ( $N=7$ ).

The ABRM contains a uniform type of muscle cell and a very small number of nerve endings (Twarog *et al.* 1973). Therefore, an overall estimation of pHi within the whole muscle by  $^{31}\text{P}$ -NMR spectroscopy reflects mainly the mean pHi within muscle cells.

In agreement with the results in our study, Walsh *et al.* (1984) estimated a pHi of 7.38 in the posterior adductor muscle and a pHi of 7.42 in the foot muscle of *Mytilus edulis* using  $^{14}\text{C}$ ]DMO. Using  $^{31}\text{P}$ -NMR spectroscopy, Ellington (1983),

however, estimated a pHi of 6.96 in the posterior adductor of *Mytilus edulis* and Chih and Ellington (1985) measured a pHi of 7.06 in the phasic adductor of the clam *Agropecten irradians concentricus*. These distinctly more acid values of pHi can be explained by the calibration curves which, in both cases, had been derived using muscle extracts obtained without a  $\text{Ca}^{2+}$  complexing agent. Apart from  $\text{H}^+$ , the cations which affect the chemical shift of inorganic phosphate (Pi) are mainly divalent ( $\text{Mg}^{2+}$  and  $\text{Ca}^{2+}$ ; Hamm and Yue, 1987). During the extraction of muscle tissue,  $\text{Ca}^{2+}$  is released from  $\text{Ca}^{2+}$ -storing vesicles (Atsumi and Sugi, 1976). Therefore, we homogenized the ABRMs using EGTA to complex  $\text{Ca}^{2+}$ , but leaving the concentration ratio of  $\text{Mg}^{2+}$  to Pi unchanged.

An important parameter affecting pHi is the intracellular buffering capacity, which consists of two components, the bicarbonate and the non-bicarbonate or intrinsic buffering system. The latter component consists mainly of charged groups of proteins and other organic molecules. In previous studies Walsh *et al.* (1984) estimated an intrinsic buffering capacity of  $23.9 \pm 2.6 \text{ mmol l}^{-1} \text{ pH unit}^{-1}$  by titrating tissue homogenates of the posterior adductor muscle of *Mytilus edulis*. Monitoring pHi by  $^{31}\text{P}$ -NMR in intact ABRMs treated with  $\text{NH}_4\text{Cl}$  pulses, we measured a total intracellular buffering capacity of  $26.5 \pm 0.7 \text{ mmol l}^{-1} \text{ pH unit}^{-1}$  ( $N=3$ ). Under normocapnic conditions ( $P_{\text{CO}_2}=0.031 \text{ kPa}$ ) the bicarbonate buffering capacity ( $0.4 \text{ mmol l}^{-1} \text{ pH unit}^{-1}$ ), which was calculated according to Heisler (1986), could be neglected. Consequently, the total buffering capacity was found to be nearly equal to the intrinsic buffering capacity ( $26.8 \pm 1.6 \text{ mmol l}^{-1} \text{ pH unit}^{-1}$ ) estimated in intact ABRMs by  $\text{CO}_2$  pulse experiments. The buffering capacity in ABRMs becomes important when, for example during the working phase of an isotonic contraction, the transphosphorylation of phospho-L-arginine restricts the alkalization to a change by about 0.1 pH units.

The buffering capacity in the ABRM is similar to buffer values in muscle tissues from other marine invertebrates, which have been estimated with pH-sensitive microelectrodes (for a review, see Roos and Boron, 1981). In a recent  $^{31}\text{P}$ -NMR study Wiseman and Ellington (1989) estimated a total intracellular buffering capacity of about  $30 \text{ mmol l}^{-1} \text{ pH unit}^{-1}$  in the radular protractor muscle of the whelk *Busycan canaliculatum*. The study of Wiseman and Ellington (1989) and this study demonstrate the validity of  $^{31}\text{P}$ -NMR spectroscopy for estimating intracellular buffering capacities in isolated tissues.

Generally, the pHi of a living cell is more alkaline than it should be if distribution of  $\text{H}^+$  was passive and followed the Nernst equation (Thomas, 1984). Since the membrane potential of the ABRM was found to be  $-65 \text{ mV}$  (Twarog, 1967; Hidaka and Goto, 1973), the equilibrium pHi of the ABRM at a pHe of 7.65 should be 6.52. Therefore, cells must continuously extrude acid equivalents or take up base equivalents by primary active  $\text{H}^+$  transporters ( $\text{H}^+$ -ATPases) or secondary active transporters coupled with the  $\text{Na}^+$  gradient being produced by a  $\text{Na}^+/\text{K}^+$ -ATPase.

Our results show that, both in the presence and in the absence of serotonin, ABRMs of *Mytilus edulis* are able to regulate their steady-state pHi within a

narrow range when subjected to changes in pHe above and below 7.65. It remains to be shown by what mechanism this muscle regulates its pHi.

When pHe was decreased to  $6.03 \pm 0.02$  in the absence of serotonin, pHi was maintained at a significantly more acidic pHi ( $7.11 \pm 0.03$ ,  $N=4$ ) than it was under standard conditions. This decrease of pHi was enhanced by the addition of DIDS (pHi= $6.93 \pm 0.10$ ), indicating involvement of an anion transport mechanism in regulation of pHi (Cabantchik *et al.* 1978). To keep the steady-state pHi constantly above the equilibrium value,  $H^+$  must be extruded or  $HCO_3^-$  must be taken up against a pH and  $HCO_3^-$  gradient. The mechanisms of pHi regulation in the absence of serotonin have been shown to be independent of the presence of extracellular  $Na^+$ . Therefore, secondary active mechanisms, such as a  $Na^+/H^+$  exchanger, a  $Na^+/HCO_3^-$  cotransporter or a  $(Na^+ + HCO_3^-)/(H^+ + Cl^-)$  exchanger, should not be involved in the regulation of pHi. Amiloride (Benos *et al.* 1976) could not be used as a probe for  $Na^+$ -dependent exchangers because it was almost insoluble ( $<0.05 \text{ mmol l}^{-1}$ ) at  $15^\circ\text{C}$  and in the presence of  $438 \text{ mmol l}^{-1} Na^+$ .

Further information was obtained from  $CO_2$ -pulse experiments. During exposure to 10%  $CO_2$  (pHe= $6.55$ ) in the absence of serotonin, pHi decreased rapidly to  $6.85 \pm 0.02$ . After the minimum pHi had been reached, a slow re-alkalinization of  $+0.006 \pm 0.001 \text{ units min}^{-1}$  was observed, from which an acid extrusion rate of  $0.38 \pm 0.02 \text{ mmol l}^{-1} \text{ min}^{-1}$  was calculated. This acid extrusion, which was again performed against a pH gradient, was completely inhibited by DIDS, but it was not inhibited in  $Na^+$ -free medium. Consequently, we have to assume the presence of an, as yet unidentified, active but  $Na^+$ -independent transport mechanism coupled to an anion transporter.  $H^+$ -ATPases are not directly inhibited by DIDS (Pedersen and Carafoli, 1987), but an electrogenic  $H^+$ -ATPase coupled to  $Cl^-$  transport could be indirectly blocked. An electroneutral  $K^+/H^+$ -ATPase, however, would not be affected by DIDS.

$Na^+$ -independent, primary active acid extrusion has not been reported from invertebrates. Muscle fibres of the barnacle *Balanus nubils*, axons from the squid *Loligo pealeii* and neurones of the terrestrial snail *Helix aspera* extrude acid equivalents by a  $Na^+$ -dependent  $Cl^-/HCO_3^-$  exchanger. In neurones of the crayfish *Procambarus clarkii* additional activity of a  $Na^+/H^+$  exchanger was observed (for a review, see Thomas, 1984). In glial cell from the leech *Hirudo medicinalis* Deitmer and Schlue (1989) found both a  $Na^+/H^+$  exchanger and an electrogenic  $Na^+ + HCO_3^-$  cotransporter.

At the onset of exposure to 10%  $CO_2$  in  $Cl^-$ -free medium in the absence of serotonin, the pHi of the ABRM decreased significantly less than under standard conditions. The buffering capacity calculated by this lower  $\Delta pHi$  was significantly greater than  $\beta_i$  estimated under standard conditions. The apparent increase of  $\beta_i$  in  $Cl^-$ -free medium could be explained by fast regulation processes. The initial rate of re-alkalinization following the minimum pHi was higher than under standard conditions, but re-alkalinization stopped suddenly and pHi remained constant thereafter. Possibly, in  $Cl^-$ -free medium, intracellular  $Cl^-$  might be trapped

within the cells. During exposure to  $\text{CO}_2$ , the activity of the  $\text{Cl}^-/\text{HCO}_3^-$  exchanger increased and the large gradient between intracellular  $\text{Cl}^-$  and the  $\text{Cl}^-$ -free medium allowed a fast, but transient, uptake of  $\text{HCO}_3^-$  as long as the intracellular stores of  $\text{Cl}^-$  were depleted.

The regulation of pHi against an alkaline load in the absence of serotonin was more efficient than the regulation against an acid load. When pHe was increased to 8.30 steady-state pHi ( $7.49 \pm 0.04$ ,  $N=4$ ) was not significantly increased. The rapid increase of pHi elicited by the removal of  $\text{CO}_2$  after a 10%  $\text{CO}_2$  pulse was followed by a re-acidification of  $-0.034 \pm 0.001$  units  $\text{min}^{-1}$  until pHi had regained its initial value.

The following lines of evidences indicate that the recovery of pHi after an alkaline load was due to  $\text{Cl}^-/\text{HCO}_3^-$  exchange. At a pHe of 8.30 the steady-state pHi ( $7.61 \pm 0.08$ ,  $N=3$ ) was significantly increased when ABRMs were incubated in the presence of DIDS and in the absence of serotonin. The activity of the  $\text{Cl}^-/\text{HCO}_3^-$  exchanger, after an alkaline load elicited by the removal of  $\text{CO}_2$ , was inhibited by DIDS and depended on extracellular  $\text{Cl}^-$ . The  $\text{Cl}^-/\text{HCO}_3^-$  exchanger used the gradient between the high (about  $15 \text{ mmol l}^{-1}$ ) intracellular and the low (about  $0.2 \text{ mmol l}^{-1}$ ) extracellular concentrations of bicarbonate. When pHi was increased by  $\text{NH}_4\text{Cl}$  under normocapnic conditions, the intracellular concentration of  $\text{HCO}_3^-$  did not increase beyond  $0.5 \text{ mmol l}^{-1}$ . Consequently, the extrusion of  $\text{HCO}_3^-$  was slow compared to that in  $\text{CO}_2$ -pulse conditions.

When serotonin was applied to the ABRM, pHi was significantly increased. This increase in pHi was independent of pHe within a range from 6.0 to 8.3 (pHi  $7.36 \pm 0.05$  to  $7.61 \pm 0.08$  versus  $7.11 \pm 0.03$  to  $7.49 \pm 0.04$  in the absence of serotonin). As the pHi in the absence of serotonin was actively regulated above the equilibrium pHi, serotonin must turn on another active transport mechanism eliciting a further increase of pHi. In the initial phase of an acid load elicited by exposure to 10%  $\text{CO}_2$ , rapid, active  $\text{H}^+$  extrusion was indicated by the high apparent buffering capacity (2.5 times  $\beta_i$  in the absence of serotonin) calculated by the  $\Delta\text{pHi}$  of  $-0.49 \pm 0.06$ ,  $N=3$ ). During  $\text{CO}_2$  exposure, pHi did not reach its initial levels because pHe was 6.55.

All effects induced by serotonin were completely inhibited in  $\text{Na}^+$ -free medium. Therefore, it can be concluded that serotonin activates a  $\text{Na}^+$ -dependent, secondary active transport mechanism. DIDS and  $\text{Cl}^-$ -free medium were used to indicate and distinguish between  $(\text{Na}^+ + \text{HCO}_3^-)/(\text{H}^+ + \text{Cl}^-)$  exchanger and  $\text{Na}^+ + \text{HCO}_3^-$  cotransport. As the effects of serotonin on the regulation of pHi were inhibited neither by DIDS nor by  $\text{Cl}^-$ -free medium, it can be concluded that serotonin induces the additional activation of a  $\text{Na}^+/\text{H}^+$  exchanger.

Within the physiological range of pHe and  $\text{CO}_2$  concentrations, the ABRM is well equipped to regulate its pHi under normoxic conditions. It is particularly important for the ABRM to control its pHi because small changes in the activity of protons affect the stretch resistance of the muscle during catch (Rüegg, 1964; Zange *et al.* 1988; Zange *et al.* 1990). In the absence of serotonin, acid extrusion is performed by an active, but  $\text{Na}^+$ -independent, mechanism which is coupled to

anion transport. We suggest that this mechanism might be an electrogenic  $H^+$ -ATPase coupled to a  $Cl^-$  transporting system. Of course, further evidence for this assumption must be provided. The extrusion of base equivalents, however, is performed by a  $Cl^-/HCO_3^-$  exchanger. Serotonin ( $10^{-5}$  mmol $l^{-1}$ ) elicits an increase in pHi by the additional activation of a  $Na^+/H^+$ -exchanger.

We thank Professor Rolf Kinne for stimulating discussion and Mr B. Griewel and Mr U. Below for technical assistance. Financial support by the Deutsche Forschungsgemeinschaft (Gr 456/9-4) is acknowledged.

### References

- ATSUMI, S. AND SUGI, H. (1976). Localization of calcium-accumulating structures in the anterior byssal retractor muscle of *Mytilus edulis* and their role in the regulation of active contraction and catch contractions. *J. Physiol., Lond.* **257**, 549–560.
- BENOS, D. J., SIMON, S. A. AND MANDEL, L. J. (1976). Effect of amiloride and some of its analogues on cation transport in isolated frog skin and thin lipid membranes. *J. gen. Physiol.* **68**, 43–63.
- BOOTH, C. E., McDONALD, D. G. AND WALSH, P. J. (1984). Acid–base balance in the sea mussel, *Mytilus edulis*. I. Effects of hypoxia and air-exposure on hemolymph acid–base status. *Mar. Biol. Lett.* **5**, 347–358.
- BOUTILIER, R. G., HEMING, T. A. AND IWAMA, G. K. (1984). Appendix: Physicochemical parameters for use in fish respiratory physiology. In *Fish Physiology*, vol. XA (ed. W. S. Hoar and D. J. Randall), pp. 403–430. New York: Academic Press.
- BRINKHOFF, W., STÖCKMANN, K. AND GRIESHABER, M. K. (1983). Natural occurrence of anaerobiosis in molluscs from intertidal habitats. *Oecologia* **57**, 151–155.
- CABANTCHIK, Z. I., KNAUFF, P. A. AND ROTHSTEIN, A. (1978). The anion transport system of the red blood cell. The role of membrane protein evaluated by the use of “probes”. *Biochim. biophys. Acta* **515**, 239–302.
- CHIH, C. P. AND ELLINGTON, W. R. (1985). Metabolic correlates of intracellular pH changes during rapid contractile activity in a molluscan muscle. *J. exp. Zool.* **236**, 27–34.
- DEITMER, J. W. AND SCHLUE, W. R. (1989). An inwardly directed electrogenic sodium–bicarbonate co-transport in leech glia cells. *J. Physiol., Lond.* **411**, 179–194.
- ELLINGTON, W. R. (1983). The extent of intracellular acidification during anoxia in the catch muscle of two bivalve molluscs. *J. exp. Zool.* **227**, 313–317.
- HAMM, J. R. AND YUE, G. M. (1987).  $^{31}P$  nuclear magnetic resonance measurements of intracellular pH in giant barnacle muscle. *Am. J. Physiol.* **252**, C30–C37.
- HEISLER, N. (ed.) (1986). *Acid–Base Regulation in Animals*. Amsterdam: Elsevier Science Publishers B.V.
- HIDAKA, T. AND GOTO, M. (1973). On the relationship between membrane potential and tension in *Mytilus* smooth muscle. *J. comp. Physiol.* **82**, 357–364.
- PEDERSEN, P. L. AND CARAFOLI, E. (1987). Ion motive ATPases. I. Ubiquity, properties, and significance to cell function. *Trends biochem. Sci.* **12**, 146–150.
- PÖRTNER, H. O. (1987). Contributions of anaerobic metabolism to pH regulation in animal tissues: theory. *J. exp. Biol.* **131**, 69–87.
- ROOS, A. AND BORON, F. (1981). Intracellular pH. *Physiol. Rev.* **61**, 296–434.
- RÜEGG, J. C. (1964). Tropomyosin–paramyosin system and “prolonged contraction” in a molluscan smooth muscle. *Proc. R. Soc. B* **160**, 536–542.
- RÜEGG, J. C. (1971). Smooth muscle tone. *Physiol. Rev.* **51**, 201–248.
- THOMAS, R. C. (1984). Experimental displacement of intracellular pH and the mechanism of its subsequent recovery. *J. Physiol., Lond.* **354**, 3P–33P.
- TWAROG, B. M. (1954). Responses of a molluscan smooth muscle to acetylcholine and 5-hydroxytryptamine. *J. cell. comp. Physiol.* **44**, 141–164.
- TWAROG, B. M. (1967). Excitation of *Mytilus* smooth muscle. *J. Physiol., Lond.* **192**, 857–868.

- TWAROG, B. M., DEWEY, M. M. AND HIDAKA, T. (1973). The structure of *Mytilus* smooth muscle and the electrical constants of the resting muscle. *J. gen. Physiol.* **61**, 207–221.
- WALSH, P. J., McDONALD, D. G. AND BOOTH, C. E. (1984). Acid–base balance in the sea mussel *Mytilus edulis*. II. Effects of hypoxia and air-exposure on intracellular acid–base status. *Mar. Biol. Lett.* **5**, 359–369.
- WISEMAN, R. W. AND ELLINGTON, W. R. (1989). Intracellular buffering capacity in molluscan muscle: superfused muscle versus homogenate. *Physiol. Zool.* **62**, 541–558.
- ZANGE, J., JANS, A. W. H., PÖRTNER, H. O. AND GRIESHABER, M. K. (1988). Regulation of catch state in *Mytilus* smooth muscle by intracellular pH measured by distribution of <sup>14</sup>C-DMO and by <sup>31</sup>P-NMR. *Pflügers Arch. ges. Physiol.* **441**, 390P.
- ZANGE, J., PÖRTNER, H. O., JANS, A. W. H. AND GRIESHABER, M. K. (1990). The intracellular pH of a molluscan smooth muscle during a contraction–catch–relaxation cycle estimated by the distribution of [<sup>14</sup>C]DMO and by <sup>31</sup>P-NMR spectroscopy. *J. exp. Biol.* **150**, 81–93.
